# Supplementary material for: Liver injury in children: signal analysis of suspected drugs based on the food and drug administration adverse event reporting system
Source: Springer Nature journal article supplement (doi:10.1186/s12887-023-04097-9), 2023-09-28
Supplement: MOESM1 [file 26100468]

**Supplementary Table 1** Terms of drug-related hepatic injury

| <b>PT</b>                              |                              |
|----------------------------------------|------------------------------|
| Acute hepatic failure                  | Hepatic necrosis             |
| Alanine aminotransferase abnormal      | Hepatitis                    |
| Alanine aminotransferase increased     | Hepatitis acute              |
| Aspartate aminotransferase abnormal    | Hepatitis cholestatic        |
| Aspartate aminotransferase increased   | Hepatitis fulminant          |
| Bilirubin conjugated increased         | Hepatitis toxic              |
| Bilirubin urine                        | Hepatotoxicity               |
| Blood bilirubin abnormal               | Hyperbilirubinaemia          |
| Blood bilirubin increased              | Jaundice                     |
| Blood bilirubin unconjugated increased | Jaundice cholestatic         |
| Cholestasis                            | Jaundice hepatocellular      |
| Coma hepatic                           | Liver function test abnormal |
| Cytolytic hepatitis                    | Liver injury                 |
| Drug-induced liver injury              | Liver transplant             |
| Hepatocellular injury                  | Mixed liver injury           |
| Hepatic encephalopathy                 | Subacute hepatic failure     |
| Hepatic enzyme abnormal                | Transaminases abnormal       |
| Hepatic enzyme increased               | Transaminases increased      |
| Hepatic failure                        | Urine bilirubin increased    |
| Hepatic function abnormal              |                              |

**SMQ**

|                                                       |                                                     |
|-------------------------------------------------------|-----------------------------------------------------|
| Drug related hepatic disorders - comprehensive search | Drug related hepatic disorders - severe events only |
|-------------------------------------------------------|-----------------------------------------------------|

PT: preferred terms, SMQ: standardized Medical Dictionary for Regulatory Activities query

**Supplementary Table 2** 2×2 contingency table for disproportionality analysis

| Drugs/AEs        | AEs of interest | Other AEs | Sums |
|------------------|-----------------|-----------|------|
| Drug of interest | a               | b         | a+b  |
| Other drugs      | c               | d         | c+d  |
| Sums             | a+c             | b+d       | n    |

AEs: adverse events

**Supplementary Table 3** Formulas and thresholds for a positive signal

| Algorithms | Formula                                                                                                                                      | Cut-offs for a positive signal                                   |
|------------|----------------------------------------------------------------------------------------------------------------------------------------------|------------------------------------------------------------------|
| ROR        | $\text{ROR} = \frac{a/c}{b/d}$ $95\% \text{ CI} = e^{\ln(\text{ROR}) \pm 1.96 \sqrt{\frac{1}{a} + \frac{1}{b} + \frac{1}{c} + \frac{1}{d}}}$ | ① $a \geq 3$ ;<br>② The low limit of 95% CI > 1                  |
| PRR        | $\text{PRR} = \frac{a/(a+b)}{c/(c+d)}$ $\chi^2 = \frac{( ad-bc -n/2)^2 n}{(a+b)(a+c)(c+d)(b+d)}$                                             | ① $a \geq 3$ ;<br>② $\text{PRR} \geq 2$ ;<br>③ $\chi^2 \geq 4$ . |

CI: confidence interval, PRR: proportional reporting ratio, ROR, reporting odds ratio

**Supplementary Table 4** Countries reporting suspected liver injury of children in the FAERS database from 2004-2020

| No. | Country        | Reports, n (%) | No. | Country            | Reports, n (%) |
|-----|----------------|----------------|-----|--------------------|----------------|
| 1   | United States  | 5,072(35.9)    | 49  | Uganda             | 13(0.1)        |
| 2   | Japan          | 1,029(7.3)     | 50  | Russia             | 12(0.1)        |
| 3   | France         | 1,013(7.2)     | 51  | Slovenia           | 12(0.1)        |
| 4   | United Kingdom | 964(6.8)       | 52  | Peru               | 11(0.1)        |
| 5   | Germany        | 531(3.8)       | 53  | Croatia            | 10(0.1)        |
| 6   | Canada         | 412(2.9)       | 54  | Venezuela          | 10(0.1)        |
| 7   | Italy          | 368(2.6)       | 55  | Lebanon            | 9(0.1)         |
| 8   | Spain          | 324(2.3)       | 56  | Nigeria            | 9(0.1)         |
| 9   | Turkey         | 260(1.8)       | 57  | Arab               | 9(0.1)         |
| 10  | China          | 313(2.2)       | 58  | Costa Rica         | 8(0.1)         |
| 11  | India          | 205(1.4)       | 59  | Pakistan           | 8(0.1)         |
| 12  | Australia      | 145(1)         | 60  | Serbia             | 8(0.1)         |
| 13  | Poland         | 134(0.9)       | 61  | Jordan             | 7(0)           |
| 14  | Brazil         | 123(0.9)       | 62  | Botswana           | 6(0)           |
| 15  | Netherlands    | 120(0.8)       | 63  | Cyprus             | 6(0)           |
| 16  | Portugal       | 85(0.6)        | 64  | Ukraine            | 6(0)           |
| 17  | South Africa   | 84(0.6)        | 65  | Bulgaria           | 5(0)           |
| 18  | Switzerland    | 82(0.6)        | 66  | Albania            | 4(0)           |
| 19  | North Korea    | 65(0.5)        | 67  | Congo              | 4(0)           |
| 20  | New Zealand    | 63(0.4)        | 68  | Indonesia          | 4(0)           |
| 21  | Mexico         | 60(0.4)        | 69  | Kazakhstan         | 4(0)           |
| 22  | Denmark        | 56(0.4)        | 70  | Kuwait             | 4(0)           |
| 23  | Belgium        | 55(0.4)        | 71  | Malawi             | 4(0)           |
| 24  | Israel         | 53(0.4)        | 72  | Morocco            | 4(0)           |
| 25  | Argentina      | 50(0.4)        | 73  | Vietnam            | 4(0)           |
| 26  | Colombia       | 50(0.4)        | 74  | Ghana              | 3(0)           |
| 27  | Thailand       | 48(0.3)        | 75  | Qatar              | 3(0)           |
| 28  | Greece         | 45(0.3)        | 76  | Côte d'Ivoire      | 2(0)           |
| 29  | Romania        | 37(0.3)        | 77  | Bolivia            | 2(0)           |
| 30  | Russia         | 36(0.3)        | 78  | Iraq               | 2(0)           |
| 31  | Ireland        | 32(0.2)        | 79  | Kenya              | 2(0)           |
| 32  | Norway         | 32(0.2)        | 80  | Latvia             | 2(0)           |
| 33  | Finland        | 31(0.2)        | 81  | Senegal            | 2(0)           |
| 34  | Austria        | 29(0.2)        | 82  | Sri Lanka          | 2(0)           |
| 35  | Hungary        | 29(0.2)        | 83  | Swaziland          | 2(0)           |
| 36  | Chile          | 26(0.2)        | 84  | Libya              | 2(0)           |
| 37  | Czech Republic | 26(0.2)        | 85  | Bangladesh         | 1(0)           |
| 38  | Slovakia       | 25(0.2)        | 86  | Cameroon           | 1(0)           |
| 39  | Algeria        | 23(0.2)        | 87  | Cuba               | 1(0)           |
| 40  | Singapore      | 23(0.2)        | 88  | East Timor         | 1(0)           |
| 41  | Tunisia        | 22(0.2)        | 89  | Estonia            | 1(0)           |
| 42  | Egypt          | 21(0.1)        | 90  | Lithuania          | 1(0)           |
| 43  | Iran           | 20(0.1)        | 91  | Malta              | 1(0)           |
| 44  | Oman           | 19(0.1)        | 92  | Moldova            | 1(0)           |
| 45  | Iceland        | 18(0.1)        | 93  | Tajikistan         | 1(0)           |
| 46  | Malaysia       | 18(0.1)        | 94  | Uruguay            | 1(0)           |
| 47  | Saudi Arabia   | 18(0.1)        | 95  | Missing or unknown | 1,550(11)      |
| 48  | Philippines    | 14(0.1)        |     |                    |                |

FAERS: Food and Drug Administration's Adverse Event Reporting System

**Supplementary Table 5** All positive signals of pediatric hepatic AEs

| ATC code<br>(2 <sup>nd</sup> level) | Drug (ATC code-5 <sup>th</sup> level) | Number of reports | PRR  | $\chi^2$ | ROR (95%CI)      | Metabolized<br>via the liver | hepatic AEs in prescribing<br>information |
|-------------------------------------|---------------------------------------|-------------------|------|----------|------------------|------------------------------|-------------------------------------------|
| A02                                 | Rebamipide (A02BX14)                  | 6                 | 6.7  | 24.7     | 9.0 (3.5-23.2)   | Yes                          | Yes                                       |
|                                     | Famotidine (A02BA03)                  | 4                 | 3.1  | 4        | 3.5 (1.2-9.9)    | Yes                          | Yes                                       |
|                                     | Omeprazole (A02BC01)                  | 4                 | 4.5  | 7.9      | 5.3 (1.8-15.7)   | Yes                          | Yes                                       |
|                                     | Lansoprazole (A02BC03)                | 3                 | 8.8  | 14.3     | 13.5 (3.2-56.4)  | Yes                          | Yes                                       |
| A03                                 | Mosapride citrate (A03FA09)           | 3                 | 5.9  | 8.1      | 7.5 (2.0-27.7)   | Yes                          | Yes                                       |
| A04                                 | Granisetron (A04AA02)                 | 14                | 2.8  | 15.2     | 3.1 (1.7-5.3)    | Yes                          | Yes                                       |
|                                     | Flupirtine (A04AD12)                  | 5                 | 4.7  | 11.6     | 5.6 (2.1-15.0)   | Yes                          | Yes                                       |
| A05                                 | Ursodeoxycholic acid (A05AA02)        | 69                | 4.3  | 180.4    | 5.1 (3.9-6.6)    | Yes                          | Yes                                       |
| A07                                 | Amphotericin B (A07AA07)              | 77                | 2.2  | 49.7     | 2.3 (1.8-2.9)    | Yes                          | Yes                                       |
|                                     | Loperamide (A07DA03)                  | 37                | 2.2  | 22.9     | 2.3 (1.6-3.2)    | Yes                          | Yes                                       |
|                                     | Sulfasalazine (A07EC01)               | 27                | 2.3  | 20       | 2.5 (1.7-3.7)    | Yes                          | Yes                                       |
| A10                                 | Pioglitazone (A10BG03)                | 6                 | 3.8  | 10.2     | 4.3 (1.8-10.4)   | Yes                          | Yes                                       |
| A11                                 | Alfacalcidol (A11CC03)                | 15                | 2.9  | 18       | 3.2 (1.9-5.5)    | Yes                          | Yes                                       |
|                                     | Nicotinamide (A11HA01)                | 11                | 3.5  | 17.9     | 3.9 (2.1-7.4)    | Yes                          | Yes                                       |
|                                     | Pyridoxal phosphate (A11HA06)         | 8                 | 4.5  | 19       | 5.3 (2.4-11.4)   | Yes                          | Yes                                       |
| A16                                 | Nitisinone (A16AX04)                  | 105               | 11.8 | 1059.8   | 22.4 (17.1-29.4) | No                           | Yes                                       |
|                                     | Glycerol phenylbutyrate (A16AX09)     | 104               | 8.9  | 747.7    | 13.7 (10.7-17.5) | Yes                          | Yes                                       |
|                                     | Caglutamic acid (A16AA05)             | 31                | 5.4  | 110      | 6.6 (4.4-9.9)    | Yes                          | Yes                                       |
|                                     | Asfotase alpha (A16AB13)              | 27                | 3.1  | 38.1     | 3.4 (2.3-5.1)    | No                           | Yes                                       |
|                                     | Sodium benzoate (A16AX11)             | 11                | 7.2  | 54.7     | 9.9 (4.9-20.1)   | Yes                          | Yes                                       |
| B01                                 | Warfarin (B01AA03)                    | 142               | 3.7  | 288.2    | 4.2 (3.5-5.1)    | Yes                          | Yes                                       |
|                                     | Enoxaparin (B01AB05)                  | 51                | 2.2  | 32.2     | 2.3 (1.7-3.1)    | Yes                          | Yes                                       |
|                                     | Dapoxetine (B01AB04)                  | 10                | 4    | 20.9     | 4.7 (2.4-9.3)    | Yes                          | Yes                                       |
|                                     | Apixaban (B01AF02)                    | 8                 | 2.7  | 7.1      | 2.9 (1.4-6.1)    | Yes                          | Yes                                       |
|                                     | Beraprost (B01AC19)                   | 7                 | 3.7  | 11.4     | 4.1 (1.8-9.3)    | Yes                          | Yes                                       |
|                                     | Fondaparinux sodium (B01AX05)         | 7                 | 6.6  | 28.9     | 8.7 (3.6-20.9)   | Yes                          | Yes                                       |
|                                     | Phenprocoumon (B01AA04)               | 5                 | 4.7  | 11.6     | 5.6 (2.1-15.0)   | Yes                          | Yes                                       |
| B02                                 | Phytomenadione (B02BA01)              | 34                | 5.1  | 112.2    | 6.2 (4.3-9.1)    | Yes                          | Yes                                       |
| C01                                 | Digoxin (C01AA05)                     | 45                | 2.3  | 32.7     | 2.4 (1.8-3.3)    | Yes                          | Yes                                       |
|                                     | Amiodarone (C01BD01)                  | 30                | 2.4  | 24.4     | 2.6 (1.8-3.8)    | Yes                          | Yes                                       |
|                                     | Milrinone (C01CE02)                   | 13                | 2.2  | 7.9      | 2.4 (1.3-4.2)    | No                           | Yes                                       |
|                                     | Propafenone (C01BC03)                 | 12                | 2.8  | 12.3     | 3.0 (1.6-5.5)    | Yes                          | Yes                                       |

|     |                                             |     |      |       |                 |     |     |
|-----|---------------------------------------------|-----|------|-------|-----------------|-----|-----|
| C02 | Bosentan (C02KX01)                          | 185 | 2    | 98.6  | 2.1 (1.8-2.5)   | Yes | Yes |
|     | Macitentan (C02KX04)                        | 24  | 2.1  | 14.1  | 2.3 (1.5-3.4)   | Yes | Yes |
|     | Hydralazine (C02DB02)                       | 18  | 4.7  | 50.8  | 5.6 (3.4-9.4)   | Yes | Yes |
| C03 | Furosemide (C03CA01)                        | 152 | 2    | 80.7  | 2.1 (1.8-2.5)   | Yes | Yes |
|     | Spironolactone (C03DA01)                    | 75  | 2.2  | 51    | 2.3 (1.9-3.0)   | Yes | Yes |
|     | Tolvaptan (C03XA01)                         | 10  | 6.2  | 40    | 8.0 (3.9-16.5)  | Yes | Yes |
| C07 | Carvedilol (C07AG02)                        | 19  | 2.3  | 13.2  | 2.4 (1.5-3.9)   | Yes | Yes |
| C08 | Amlodipine (C08CA01)                        | 10  | 2.4  | 7.1   | 2.6 (1.3-4.9)   | Yes | Yes |
| C09 | Captopril (C09AA01)                         | 29  | 2.2  | 19    | 2.3 (1.6-3.4)   | Yes | Yes |
|     | Valsartan and amlodipine (C09DB01)          | 9   | 12.4 | 87.1  | 25.3 (9.8-65.5) | Yes | Yes |
| C10 | Fenofibrate (C10AB05)                       | 13  | 4    | 27    | 4.6 (2.5-8.3)   | Yes | Yes |
|     | atorvastatin (C10AA05)                      | 7   | 2.5  | 4.9   | 2.6 (1.2-5.7)   | Yes | Yes |
|     | Fluvastatin (C10AA04)                       | 3   | 4.1  | 4.5   | 4.8 (1.4-16.7)  | Yes | Yes |
| H01 | Octreotide (H01CB02)                        | 18  | 3.1  | 24.7  | 3.4 (2.1-5.6)   | Yes | Yes |
|     | Pegvisomant (H01AX01)                       | 6   | 8.3  | 32.9  | 12.3 (4.5-33.1) | No  | Yes |
| H02 | Prednisone (H02AB07)                        | 416 | 2    | 211.8 | 2.1 (1.9-2.3)   | Yes | Yes |
|     | Prednisolone (H02AB06)                      | 401 | 2.2  | 256.3 | 2.3 (2.1-2.5)   | Yes | Yes |
|     | Methylprednisolone (H02AB04)                | 219 | 2    | 111.9 | 2.1 (1.8-2.4)   | Yes | Yes |
| H03 | Propylthiouracil (H03BA02)                  | 8   | 4.5  | 19    | 5.3 (2.4-11.4)  | Yes | Yes |
| J01 | Trimethoprim (J01EA01)                      | 336 | 2.9  | 417.3 | 3.1 (2.8-3.5)   | Yes | Yes |
|     | Sulfamethoxazole (J01EC01)                  | 291 | 2.8  | 344.5 | 3.1 (2.7-3.5)   | Yes | Yes |
|     | Minocycline (J01AA08)                       | 197 | 4.7  | 584   | 5.6 (4.8-6.6)   | Yes | Yes |
|     | Ceftriaxone (J01DD04)                       | 162 | 2.6  | 167.7 | 2.8 (2.4-3.4)   | Yes | Yes |
|     | Vancomycin (J01XA01)                        | 131 | 2.3  | 93.6  | 2.4 (2.0-2.9)   | Yes | Yes |
|     | Sulfamethoxazole and trimethoprim (J01EE01) | 126 | 3.5  | 225.5 | 3.9 (3.2-4.7)   | Yes | Yes |
|     | Meropenem (J01DH02)                         | 71  | 2.4  | 58.6  | 2.6 (2.0-3.3)   | Yes | Yes |
|     | Levofloxacin (J01MA12)                      | 61  | 3    | 83    | 3.3 (2.5-4.3)   | Yes | Yes |
|     | Cefotaxime (J01DD01)                        | 59  | 3.2  | 90.4  | 3.5 (2.7-4.7)   | Yes | Yes |
|     | Piperacillin (J01CA12)                      | 53  | 2.5  | 48    | 2.7 (2.0-3.6)   | No  | Yes |
|     | Tazobactam (J01CG02)                        | 50  | 2.4  | 41    | 2.6 (1.9-3.4)   | Yes | Yes |
|     | Amikacin (J01GB06)                          | 49  | 2.7  | 50.9  | 2.9 (2.1-3.9)   | No  | Yes |
|     | Ampicillin (J01CA01)                        | 49  | 2.2  | 33.6  | 2.4 (1.8-3.2)   | Yes | Yes |
|     | Linezolid (J01XX08)                         | 44  | 2.4  | 35.9  | 2.6 (1.9-3.5)   | Yes | Yes |
|     | Ceftazidime (J01DD02)                       | 34  | 3.1  | 47.7  | 3.4 (2.4-4.9)   | No  | Yes |
|     | Benzylpenicillin (J01CE01)                  | 29  | 2.4  | 22.6  | 2.5 (1.7-3.7)   | Yes | Yes |

|     |                                                 |     |      |        |                   |     |     |
|-----|-------------------------------------------------|-----|------|--------|-------------------|-----|-----|
|     | Amoxicillin/clavulanic acid potassium (J01CR02) | 27  | 2.1  | 15.5   | 2.2 (1.5-3.3)     | Yes | Yes |
|     | Moxifloxacin (J01MA14)                          | 24  | 2.7  | 24.4   | 2.9 (1.9-4.4)     | Yes | Yes |
|     | Cefepime (J01DE01)                              | 21  | 2    | 10.2   | 2.1 (1.4-3.3)     | Yes | Yes |
|     | Teicoplanin (J01XA02)                           | 19  | 3.3  | 29.5   | 3.7 (2.3-6.0)     | No  | Yes |
|     | Cefazolin (J01DB04)                             | 17  | 2.5  | 13.9   | 2.6 (1.6-4.4)     | Yes | Yes |
|     | Streptomycin (J01GA01)                          | 17  | 4    | 36.7   | 4.6 (2.7-7.8)     | No  | Yes |
|     | Oxacillin (J01CF04)                             | 16  | 7.7  | 89.9   | 10.9 (6.0-19.8)   | Yes | Yes |
|     | Ofloxacin (J01MA01)                             | 15  | 2.8  | 16.5   | 3.1 (1.8-5.3)     | Yes | Yes |
|     | Piperacillin/tazobactam (J01CR05)               | 12  | 3.6  | 21     | 4.1 (2.2-7.6)     | Yes | Yes |
|     | Sulbactam (J01CG01)                             | 12  | 2.2  | 7.1    | 2.3 (1.3-4.3)     | No  | Yes |
|     | Cefpodoxime (J01DD13)                           | 11  | 2.5  | 8.5    | 2.6 (1.4-4.9)     | No  | Yes |
|     | Daptomycin (J01XX09)                            | 10  | 4.4  | 24.2   | 5.2 (2.6-10.4)    | No  | Yes |
|     | Telithromycin (J01FA15)                         | 8   | 5.1  | 23.2   | 6.2 (2.8-13.6)    | Yes | Yes |
|     | Doxycycline hydrochloride (J01AA02)             | 7   | 4.6  | 16.8   | 5.4 (2.4-12.4)    | Yes | Yes |
|     | Phenoxymethylpenicillin (J01CE02)               | 7   | 4.6  | 16.8   | 5.4 (2.4-12.4)    | Yes | Yes |
|     | Ciprofloxacin (J01MA02)                         | 6   | 15.6 | 71.3   | 44.9 (11.2-179.7) | Yes | Yes |
|     | Norfloxacin (J01MA06)                           | 5   | 5.9  | 16.3   | 7.5 (2.7-20.6)    | Yes | Yes |
|     | Tigecycline (J01AA12)                           | 3   | 4.1  | 4.5    | 4.8 (1.4-16.7)    | Yes | Yes |
|     | Cefpirome (J01DE02)                             | 3   | 17.6 | 33.2   | 67.4 (7.0-647.8)  | Yes | Yes |
|     | Sulfadiazine (J01EC02)                          | 3   | 4.4  | 5.1    | 5.2 (1.5-18.2)    | Yes | Yes |
| J02 | Fluconazole (J02AC01)                           | 101 | 2.7  | 109.4  | 2.9 (2.4-3.6)     | Yes | Yes |
|     | Voriconazole (J02AC03)                          | 92  | 2.9  | 116.7  | 3.2 (2.5-3.9)     | Yes | Yes |
|     | Micafungin (J02AX05)                            | 27  | 2.7  | 28.3   | 2.9 (2.0-4.4)     | Yes | Yes |
|     | Caspofungin (J02AX04)                           | 12  | 4    | 25.4   | 4.6 (2.5-8.7)     | Yes | Yes |
|     | Posaconazole (J02AC04)                          | 6   | 3.4  | 8      | 3.7 (1.6-8.9)     | Yes | Yes |
| J04 | Isoniazid (J04AC01)                             | 205 | 7.2  | 1106.1 | 9.8 (8.3-11.5)    | Yes | Yes |
|     | Rifampicin (J04AB02)                            | 192 | 6.4  | 883.9  | 8.3 (7.0-9.8)     | Yes | Yes |
|     | Pyrazinamide (J04AK01)                          | 141 | 7.2  | 768.5  | 9.9 (8.1-12.1)    | Yes | Yes |
|     | Ethambutol (J04AK02)                            | 108 | 6.7  | 538.1  | 9.0 (7.2-11.2)    | Yes | Yes |
|     | Dapsone (J04BA02)                               | 27  | 3.3  | 42.4   | 3.7 (2.4-5.5)     | Yes | Yes |
|     | Clofazimine (J04BA01)                           | 18  | 4.5  | 47.5   | 5.3 (3.2-8.9)     | Yes | Yes |
|     | Bedaquiline (J04AK05)                           | 13  | 6.6  | 59.2   | 8.9 (4.7-16.8)    | Yes | Yes |
|     | Ethionamide (J04AD03)                           | 11  | 3.1  | 14.7   | 3.5 (1.8-6.6)     | Yes | Yes |
|     | Cycloserine (J04AB01)                           | 10  | 3.7  | 18.1   | 4.2 (2.2-8.3)     | Yes | Yes |
|     | Delamanid (J04AK06)                             | 10  | 5.1  | 30.3   | 6.2 (3.1-12.6)    | Yes | Yes |

|     |                                                  |     |     |       |                 |     |     |
|-----|--------------------------------------------------|-----|-----|-------|-----------------|-----|-----|
|     | Protionamide (J04AD01)                           | 5   | 9   | 29.3  | 14.0 (4.6-42.9) | Yes | Yes |
|     | Capreomycin (J04AB30)                            | 4   | 3.6 | 5.4   | 4.1 (1.4-11.9)  | Yes | Yes |
| J05 | Lamivudine (J05AF05)                             | 166 | 2.3 | 122   | 2.4 (2.1-2.8)   | Yes | Yes |
|     | Aciclovir (J05AB01)                              | 111 | 2.4 | 89.2  | 2.5 (2.1-3.1)   | Yes | Yes |
|     | Abacavir (J05AF06)                               | 72  | 3.1 | 106.8 | 3.5 (2.7-4.5)   | Yes | Yes |
|     | Nevirapine (J05AG01)                             | 66  | 2.2 | 41.2  | 2.3 (1.8-2.9)   | Yes | Yes |
|     | Atazanavir (J05AE08)                             | 58  | 3.6 | 108.6 | 4.0 (3.0-5.3)   | Yes | Yes |
|     | Didanosine (J05AF02)                             | 58  | 3.4 | 101.3 | 3.8 (2.9-5.1)   | Yes | Yes |
|     | Stavudine (J05AF04)                              | 52  | 2.9 | 64.6  | 3.1 (2.4-4.2)   | Yes | Yes |
|     | Efavirenz (J05AG03)                              | 42  | 2.4 | 34.7  | 2.6 (1.9-3.5)   | Yes | Yes |
|     | Zidovudine (J05AF01)                             | 36  | 2.2 | 23.9  | 2.3 (1.7-3.3)   | Yes | Yes |
|     | Ganciclovir (J05AB06)                            | 34  | 3   | 44.6  | 3.3 (2.3-4.7)   | Yes | Yes |
|     | Nelfinavir (J05AE04)                             | 26  | 2.2 | 17.4  | 2.4 (1.6-3.6)   | Yes | Yes |
|     | Ribavirin (J05AP01)                              | 25  | 2.7 | 25.5  | 2.9 (1.9-4.4)   | Yes | Yes |
|     | Ritonavir (J05AE03)                              | 19  | 2.9 | 22.1  | 3.1 (1.9-5.0)   | Yes | Yes |
|     | Entecavir (J05AF10)                              | 10  | 4   | 20.9  | 4.7 (2.4-9.3)   | No  | Yes |
|     | Lamivudine and abacavir (J05AR02)                | 8   | 3.1 | 9.6   | 3.4 (1.6-7.1)   | Yes | Yes |
|     | Valganciclovir (J05AB14)                         | 6   | 5.2 | 17.2  | 6.4 (2.6-15.9)  | Yes | Yes |
|     | Simeprevir (J05AP05)                             | 5   | 9.8 | 32.5  | 16.0 (5.1-50.6) | Yes | Yes |
|     | Abacavir/lamivudine/zidovudine sulfate (J05AR04) | 4   | 3.2 | 4.3   | 3.6 (1.3-10.3)  | Yes | Yes |
|     | Amprenavir (J05AE05)                             | 4   | 4.7 | 8.6   | 5.6 (1.9-16.8)  | Yes | Yes |
|     | Saquinavir (J05AE01)                             | 4   | 3.6 | 5.4   | 4.1 (1.4-11.9)  | Yes | Yes |
|     | Tebivudine (J05AF11)                             | 3   | 6.4 | 9.2   | 8.4 (2.2-31.8)  | No  | Yes |
| J06 | Anti-D (rh) immunoglobulin (J06BB01)             | 5   | 3.9 | 8.5   | 4.5 (1.7-11.7)  | No  | Yes |
| L01 | Methotrexate (L01BA01)                           | 878 | 2.4 | 668.6 | 2.5 (2.3-2.7)   | Yes | Yes |
|     | Vincristine (L01CA02)                            | 649 | 2.8 | 728.4 | 3.0 (2.8-3.3)   | Yes | Yes |
|     | Cyclophosphamide (L01AA01)                       | 490 | 2.3 | 342   | 2.4 (2.2-2.6)   | Yes | Yes |
|     | Etoposide (L01CB01)                              | 378 | 2.2 | 249.6 | 2.3 (2.1-2.6)   | Yes | Yes |
|     | Cytarabine (L01BC01)                             | 344 | 2.6 | 349.4 | 2.8 (2.5-3.2)   | Yes | Yes |
|     | Mercaptopurine (L01BB02)                         | 240 | 3   | 318   | 3.2 (2.8-3.7)   | Yes | Yes |
|     | Daunorubicin (L01DB02)                           | 207 | 3.3 | 332.1 | 3.6 (3.1-4.2)   | Yes | Yes |
|     | Pegaspargase (L01XX24)                           | 180 | 3.9 | 404.4 | 4.5 (3.9-5.3)   | No  | Yes |
|     | Asparaginase (L01XX02)                           | 163 | 2.6 | 165.7 | 2.8 (2.4-3.3)   | No  | Yes |
|     | Cisplatin (L01XA01)                              | 155 | 2.1 | 95.8  | 2.3 (1.9-2.7)   | No  | Yes |
|     | Busulfan (L01AB01)                               | 125 | 2.5 | 113.9 | 2.7 (2.2-3.2)   | Yes | Yes |

|                                 |    |      |       |                   |     |     |
|---------------------------------|----|------|-------|-------------------|-----|-----|
| Thiotepa (L01AC01)              | 85 | 3.2  | 129.9 | 3.5 (2.8-4.4)     | Yes | Yes |
| Actinomycin (L01DA01)           | 79 | 2.8  | 91.7  | 3.0 (2.4-3.8)     | Yes | Yes |
| Clofarabine (L01BB06)           | 76 | 4.1  | 178.2 | 4.7 (3.7-6.0)     | No  | Yes |
| Imatinib (L01XE01)              | 75 | 2.5  | 65.5  | 2.6 (2.1-3.3)     | Yes | Yes |
| Tioguanine (L01BB03)            | 44 | 3.3  | 73    | 3.7 (2.7-5.1)     | Yes | Yes |
| Bortezomib (L01XX32)            | 37 | 3.2  | 55.1  | 3.5 (2.5-5.0)     | Yes | Yes |
| Vinblastine (L01CA01)           | 35 | 2.6  | 35.3  | 2.8 (2.0-4.0)     | Yes | Yes |
| Mitoxantrone (L01DB07)          | 32 | 2.1  | 18.2  | 2.2 (1.5-3.2)     | Yes | Yes |
| Gemcitabine (L01BC05)           | 26 | 2.6  | 24.5  | 2.8 (1.8-4.2)     | Yes | Yes |
| Fluorouracil (L01BC02)          | 25 | 2.3  | 18.8  | 2.5 (1.7-3.8)     | Yes | Yes |
| Hydroxycarbamide (L01XX05)      | 24 | 2.3  | 17.1  | 2.4 (1.6-3.7)     | Yes | Yes |
| Crizotinib (L01XE16)            | 23 | 4.6  | 63.4  | 5.4 (3.5-8.6)     | Yes | Yes |
| Sorafenib (L01XE05)             | 23 | 2.8  | 26.8  | 3.1 (2.0-4.8)     | Yes | Yes |
| Paclitaxel (L01CD01)            | 20 | 3    | 25.6  | 3.3 (2.1-5.2)     | Yes | Yes |
| Nilotinib (L01XE08)             | 16 | 3.8  | 32.1  | 4.4 (2.6-7.5)     | Yes | Yes |
| Oxaliplatin (L01XA03)           | 16 | 3.6  | 29.4  | 4.1 (2.4-7.0)     | No  | Yes |
| Carmustine (L01AD01)            | 15 | 5.6  | 54.3  | 7.0 (3.9-12.5)    | Yes | Yes |
| Melphalan (L01AA03)             | 14 | 2    | 6.7   | 2.1 (1.2-3.7)     | No  | Yes |
| Fludarabine (L01BB05)           | 13 | 3    | 16    | 3.3 (1.8-5.9)     | No  | Yes |
| Darafenib (L01XE23)             | 13 | 2.9  | 14.7  | 3.1 (1.8-5.6)     | Yes | Yes |
| Docetaxel (L01CD02)             | 12 | 2.1  | 6.1   | 2.2 (1.2-4.0)     | Yes | Yes |
| Lomustine (L01AD02)             | 11 | 2.9  | 12.1  | 3.1 (1.7-5.9)     | Yes | Yes |
| Pazopanib (L01XE11)             | 11 | 2.3  | 7.5   | 2.5 (1.3-4.7)     | Yes | Yes |
| Vandetanib (L01XE12)            | 11 | 14.3 | 128.9 | 35.3 (13.7-91.1)  | Yes | Yes |
| Ruxolitinib (L01XE18)           | 10 | 2.7  | 9.4   | 2.9 (1.5-5.6)     | Yes | Yes |
| Dasatinib (L01XE06)             | 9  | 3.1  | 11.3  | 3.4 (1.7-6.9)     | Yes | Yes |
| Cladribine (L01BB04)            | 9  | 2.8  | 9.2   | 3.1 (1.5-6.1)     | No  | Yes |
| Ceritinib (L01XE28)             | 8  | 6.7  | 34.8  | 9.0 (4.0-20.4)    | Yes | Yes |
| Gemtuzumab (L01XC05)            | 8  | 3    | 9.3   | 3.3 (1.6-7.0)     | No  | Yes |
| Vinorelbine (L01CA04)           | 8  | 2.3  | 5     | 2.5 (1.2-5.1)     | Yes | Yes |
| Inotuzumab ozogamicin (L01XC26) | 7  | 5    | 19.3  | 6.0 (2.6-13.9)    | No  | Yes |
| Dinutuximab (L01XC16)           | 7  | 2.5  | 4.9   | 2.6 (1.2-5.7)     | No  | Yes |
| Erlotinib (L01XE03)             | 5  | 3.1  | 5.3   | 3.4 (1.3-8.7)     | Yes | Yes |
| Ribociclib (L01XE42)            | 5  | 6.9  | 20.5  | 9.4 (3.3-26.6)    | Yes | Yes |
| Trabectedin (L01CX01)           | 5  | 16.8 | 61.8  | 56.2 (10.9-289.5) | Yes | Yes |



|     |                                                 |       |      |        |                  |     |     |
|-----|-------------------------------------------------|-------|------|--------|------------------|-----|-----|
|     | Sunitinib (L01XE04)                             | 5     | 5.6  | 15.2   | 7.0 (2.6-19.2)   | Yes | Yes |
|     | Carboplatin (L01XA02)                           | 4     | 3.4  | 4.7    | 3.7 (1.3-10.8)   | No  | Yes |
|     | Decitabine (L01BC08)                            | 4     | 3.5  | 5      | 3.9 (1.4-11.3)   | Yes | Yes |
|     | Ibrutinib (L01XE27)                             | 4     | 4.7  | 8.6    | 5.6 (1.9-16.8)   | Yes | Yes |
|     | Panitumumab (L01XC08)                           | 4     | 9.4  | 23.1   | 15.0 (4.2-53.1)  | Yes | Yes |
|     | Gefitinib (L01XE02)                             | 4     | 5.2  | 10.2   | 6.4 (2.1-19.5)   | Yes | Yes |
|     | Nelarabine (L01BB07)                            | 3     | 5.9  | 8.1    | 7.5 (2.0-27.7)   | Yes | Yes |
|     | Aclarubicin (L01DB04)                           | 3     | 11.7 | 20.6   | 22.5 (4.5-111.3) | Yes | Yes |
| L03 | Interferon alpha-2b (L03AB05)                   | 11    | 4.8  | 30.5   | 5.7 (3.0-11.2)   | Yes | Yes |
|     | Peginterferon alfa-2b (L03AB10)                 | 10    | 2.2  | 5.9    | 2.4 (1.2-4.5)    | Yes | Yes |
|     | filgrastim (L03AA02)                            | 61    | 2.5  | 56.2   | 2.7 (2.1-3.5)    | Yes | Yes |
| L04 | Tacrolimus (L04AD02)                            | 427   | 2.3  | 310.2  | 2.4 (2.2-2.7)    | Yes | Yes |
|     | Ciclosporin (L04AD01)                           | 301   | 2.1  | 177.9  | 2.2 (2.0-2.5)    | Yes | Yes |
|     | Sirolimus (L04AA10)                             | 74    | 2.5  | 67.6   | 2.7 (2.1-3.4)    | Yes | Yes |
|     | Tocilizumab (L04AC07)                           | 71    | 2.9  | 91.9   | 3.2 (2.5-4.1)    | No  | Yes |
|     | Anakinra (L04AC03)                              | 51    | 2.4  | 41.6   | 2.6 (1.9-3.4)    | No  | Yes |
|     | Basiliximab (L04AC02)                           | 39    | 2.9  | 50.2   | 3.2 (2.3-4.5)    | No  | Yes |
|     | Antithymocyte immunoglobulin (rabbit) (L04AA04) | 24    | 2.8  | 26.6   | 3.0 (2.0-4.6)    | No  | Yes |
|     | Leflunomide (L04AA13)                           | 24    | 2.4  | 19.4   | 2.6 (1.7-3.9)    | Yes | Yes |
|     | Canakinumab (L04AC08)                           | 18    | 2.1  | 9.6    | 2.2 (1.4-3.6)    | No  | Yes |
|     | Azathioprine (L04AX01)                          | 18    | 2.8  | 20.2   | 3.1 (1.9-5.0)    | Yes | Yes |
|     | Lenalidomide (L04AX04)                          | 4     | 3.6  | 5.4    | 4.1 (1.4-11.9)   | No  | Yes |
|     | Antilymphocyte immunoglobulin (horse) (L04AA03) | 4     | 3.4  | 4.7    | 3.7 (1.3-10.8)   | No  | Yes |
| M01 | Ketoprofen (M01AE03)                            | 18    | 2.3  | 12.2   | 2.4 (1.5-3.9)    | Yes | Yes |
|     | Piroxicam (M01AC01)                             | 14    | 4.8  | 40.5   | 5.8 (3.2-10.5)   | Yes | Yes |
|     | Ibuprofen (M01AE01)                             | 13    | 2.6  | 11.4   | 2.8 (1.5-4.9)    | Yes | Yes |
|     | Penicillamine (M01CC01)                         | 5     | 4.2  | 9.6    | 4.9 (1.9-12.8)   | Yes | Yes |
| M02 | Diclofenac (M02AA15)                            | 12    | 2.2  | 6.5    | 2.3 (1.3-4.1)    | Yes | Yes |
| M04 | Allopurinol (M04AA01)                           | 36    | 3.3  | 56.6   | 3.6 (2.6-5.2)    | Yes | Yes |
|     | Colchicine (M04AC01)                            | 34    | 2.9  | 43.3   | 3.2 (2.2-4.6)    | Yes | Yes |
|     | Febuxostat (M04AA03)                            | 3     | 5.4  | 7.1    | 6.7 (1.9-24.5)   | Yes | Yes |
| M05 | Pamidronic acid (M05BA03)                       | 4     | 3.2  | 4.3    | 3.6 (1.3-10.3)   | Yes | Yes |
| M09 | Sovaprevir (M09AX09)                            | 14    | 11.7 | 132.5  | 22.5 (10.7-47.2) | Yes | Yes |
| N02 | Paracetamol (N02BE01)                           | 1,365 | 3.3  | 1968.2 | 3.6 (3.4-3.8)    | Yes | Yes |
|     | Acetylsalicylic acid (N02BA01)                  | 129   | 2    | 66.5   | 2.1 (1.8-2.5)    | Yes | Yes |

|                       |                                         |                      |      |       |                 |               |     |     |
|-----------------------|-----------------------------------------|----------------------|------|-------|-----------------|---------------|-----|-----|
| N03                   | Nefopam (N02BG06)                       | 5                    | 10.7 | 36.2  | 18.7 (5.7-61.3) | Yes           | No  |     |
|                       | Valproic acid (N03AG01)                 | 511                  | 3    | 661.3 | 3.2 (2.9-3.6)   | Yes           | Yes |     |
|                       | Carbamazepine (N03AF01)                 | 283                  | 2.4  | 230.4 | 2.5 (2.2-2.9)   | Yes           | Yes |     |
|                       | Phenytoin (N03AB02)                     | 179                  | 2.9  | 229.3 | 3.2 (2.7-3.7)   | Yes           | Yes |     |
|                       | Phenobarbital (N03AA02)                 | 147                  | 2.7  | 164.5 | 3.0 (2.5-3.5)   | Yes           | Yes |     |
|                       | Ethosuximide (N03AD01)                  | 34                   | 2.1  | 19    | 2.2 (1.5-3.1)   | Yes           | Yes |     |
|                       | Fosphenytoin (N03AB05)                  | 21                   | 2.7  | 22.4  | 3.0 (1.9-4.7)   | Yes           | Yes |     |
|                       | Felbamate (N03AX10)                     | 16                   | 2.7  | 15.9  | 2.9 (1.7-4.9)   | Yes           | Yes |     |
|                       | Zonisamide (N03AX15)                    | 8                    | 2.8  | 8.2   | 3.1 (1.5-6.5)   | Yes           | Yes |     |
| N04                   | Valpromide (N03AG02)                    | 7                    | 10.3 | 51.8  | 17.5 (6.5-46.9) | Yes           | Yes |     |
|                       | Trihexyphenidyl hydrochloride (N04AA01) | 6                    | 4.7  | 14.6  | 5.6 (2.3-13.7)  | Yes           | Yes |     |
| N05                   | Thiopental sodium (N05CA19)             | 16                   | 3.1  | 22    | 3.5 (2.0-5.9)   | Yes           | No  |     |
|                       | Dexmedetomidine (N05CM18)               | 10                   | 5.2  | 31.3  | 6.4 (3.2-13.0)  | Yes           | Yes |     |
|                       | Amisulpride (N05AL05)                   | 10                   | 4    | 20.3  | 4.6 (2.3-9.1)   | Yes           | Yes |     |
|                       | Fluphenazine (N05AB02)                  | 10                   | 8.4  | 60.4  | 12.5 (5.8-27.1) | Yes           | Yes |     |
|                       | Temazepam (N05CD07)                     | 9                    | 2.2  | 5.3   | 2.4 (1.2-4.7)   | Yes           | No  |     |
|                       | Levomepromazine (N05AA02)               | 5                    | 3.7  | 7.5   | 4.2 (1.6-10.8)  | Yes           | Yes |     |
|                       | Perphenazine (N05AB03)                  | 5                    | 3.5  | 6.7   | 3.9 (1.5-10.0)  | Yes           | Yes |     |
|                       | Sulpiride (N05AL01)                     | 5                    | 3.8  | 8     | 4.3 (1.7-11.3)  | Yes           | Yes |     |
|                       | N06                                     | Imipramine (N06AA02) | 18   | 2.4   | 14.5            | 2.6 (1.6-4.3) | Yes | Yes |
|                       |                                         | Doxepin (N06AA12)    | 13   | 2.7   | 12.3            | 2.9 (1.6-5.1) | Yes | Yes |
| Moclobemide (N06AG02) |                                         | 3                    | 8.8  | 14.3  | 13.5 (3.2-56.4) | Yes           | Yes |     |
| Pemoline (N06BA05)    |                                         | 3                    | 8.8  | 14.3  | 13.5 (3.2-56.4) | Yes           | Yes |     |
| N07                   | Naltrexone (N07BB04)                    | 10                   | 2.7  | 9.7   | 3.0 (1.5-5.7)   | Yes           | Yes |     |
| P01                   | Pentamidine isethionate (P01CX01)       | 18                   | 3.6  | 33.3  | 4.1 (2.5-6.8)   | No            | Yes |     |
|                       | Atovaquone (P01AX06)                    | 11                   | 2    | 5.1   | 2.1 (1.2-4.0)   | No            | Yes |     |
|                       | Chloroquine (P01BA01)                   | 10                   | 3.5  | 15.7  | 3.9 (2.0-7.6)   | Yes           | Yes |     |
|                       | Primaquine (P01BA03)                    | 5                    | 9    | 29.3  | 14.0 (4.6-42.9) | Yes           | No  |     |
|                       | Pyrimethamine (P01BD01)                 | 4                    | 3.1  | 4     | 3.5 (1.2-9.9)   | Yes           | No  |     |
| P02                   | Albendazole (P02CA03)                   | 20                   | 2.9  | 24.3  | 3.2 (2.0-5.1)   | Yes           | Yes |     |
|                       | Praziquantel (P02BA01)                  | 5                    | 5.1  | 13.2  | 6.2 (2.3-16.8)  | Yes           | Yes |     |
| V03                   | Deferasirox (V03AC03)                   | 212                  | 4.5  | 592.3 | 5.3 (4.6-6.2)   | Yes           | Yes |     |
|                       | Dexrazoxane (V03AF02)                   | 23                   | 4.2  | 55.6  | 4.9 (3.1-7.7)   | Yes           | Yes |     |
|                       | Desferrioxamine (V03AC01)               | 19                   | 3.9  | 39.4  | 4.5 (2.7-7.3)   | Yes           | Yes |     |
|                       | Deferiprone (V03AC02)                   | 9                    | 3    | 10.6  | 3.3 (1.6-6.7)   | Yes           | Yes |     |

|     |                                             |     |      |       |                      |     |     |
|-----|---------------------------------------------|-----|------|-------|----------------------|-----|-----|
|     | Rasburicase (V03AF07)                       | 8   | 3.2  | 10.7  | 3.6 (1.7-7.6)        | No  | Yes |
|     | Calcium levofolinate (V03AF04)              | 3   | 14.1 | 25.6  | 33.7 (5.6-201.6)     | Yes | Yes |
| D01 | Terbinafine hydrochloride (D01AE15)         | 7   | 2.7  | 6.3   | 3.0 (1.3-6.5)        | Yes | Yes |
| D10 | Isotretinoin (D10AD04)                      | 182 | 2.4  | 146.5 | 2.5 (2.2-2.9)        | Yes | Yes |
| G03 | norgestimate and ethinylestradiol (G03AA11) | 14  | 2.6  | 12.6  | 2.8 (1.6-4.9)        | Yes | Yes |
| R03 | Pranlukast (R03DC02)                        | 6   | 3.3  | 7.7   | 3.6 (1.5-8.6)        | No  | Yes |
| R05 | Mesna (R05CB05)                             | 35  | 2.5  | 30.4  | 2.6 (1.9-3.8)        | No  | Yes |
|     | Acetylcysteine (R05CB01)                    | 19  | 2.8  | 20.3  | 3.0 (1.9-4.8)        | Yes | No  |
| R06 | Ketotifen (R06AX17)                         | 10  | 2.3  | 6.5   | 2.5 (1.3-4.7)        | Yes | Yes |
| NA  | Sodium valproate                            | 67  | 3.4  | 112.7 | 3.7 (2.9-4.9)        | Yes | Yes |
|     | Phenylbutyric acid                          | 11  | 10.3 | 87.2  | 17.7 (8.0-38.9)      | Yes | Yes |
|     | Teceleukin                                  | 8   | 20.9 | 137.9 | 179.8 (22.5-1,437.4) | No  | Yes |
|     | Omega-3-Acid Ethyl Esters                   | 8   | 5.9  | 28.8  | 7.5 (3.4-16.7)       | No  | Yes |
|     | Aminosalicylic acid                         | 8   | 3.5  | 12.7  | 4.0 (1.9-8.5)        | Yes | Yes |
|     | Adenosine deaminase                         | 8   | 3.6  | 13.2  | 4.1 (1.9-8.7)        | No  | Yes |
|     | Butalbital/paracetamol/caffeine             | 7   | 5.7  | 23.4  | 7.1 (3.1-16.7)       | Yes | Yes |
|     | Loxoprofen                                  | 6   | 3.4  | 8.4   | 3.9 (1.6-9.2)        | Yes | Yes |
|     | Mizoribine                                  | 6   | 2.6  | 4.6   | 2.8 (1.2-6.6)        | No  | Yes |
|     | Penicillin V potassium                      | 5   | 5.6  | 15.2  | 7.0 (2.6-19.2)       | Yes | Yes |
|     | Propoxyphene napsylate                      | 4   | 15.6 | 43    | 44.9 (8.2-245.3)     | Yes | Yes |
|     | Teprenone                                   | 4   | 3.9  | 6.3   | 4.5 (1.5-13.1)       | Yes | Yes |
|     | Medium-chain triglycerides                  | 3   | 4.1  | 4.5   | 4.8 (1.4-16.7)       | Yes | Yes |

AEs: adverse events, ATC: anatomical therapeutic chemical classification, PRR: proportional reporting ratio, ROR: reporting odds ratio
